# Supplementary material
Source: PubMed Central journal article supplement (PMC3188866)

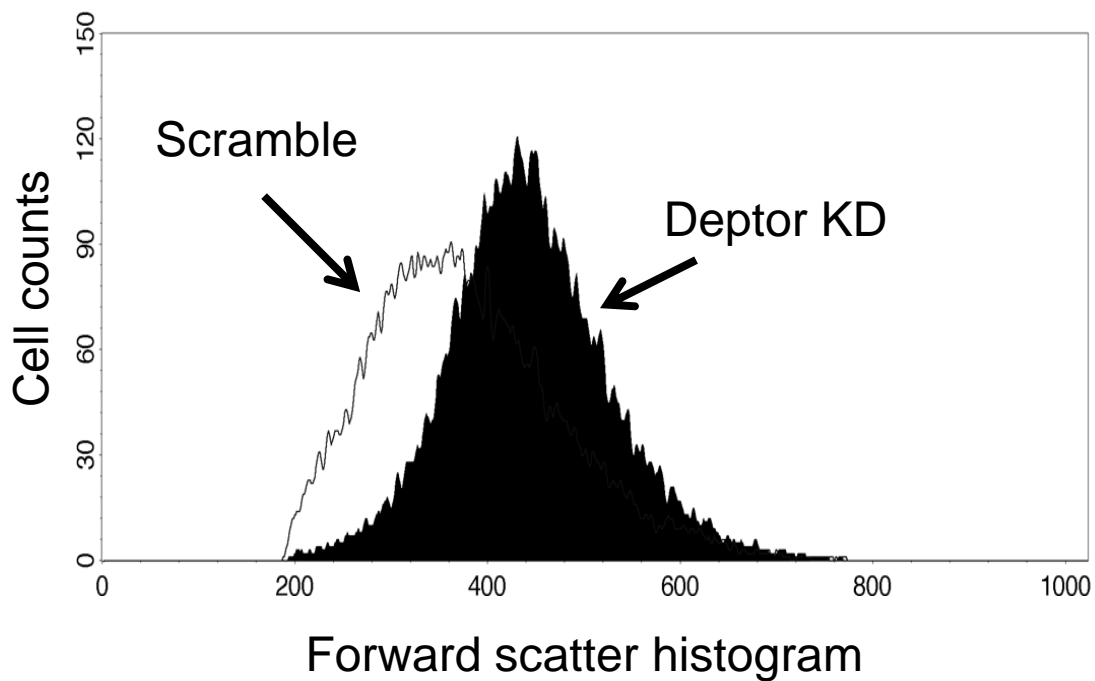

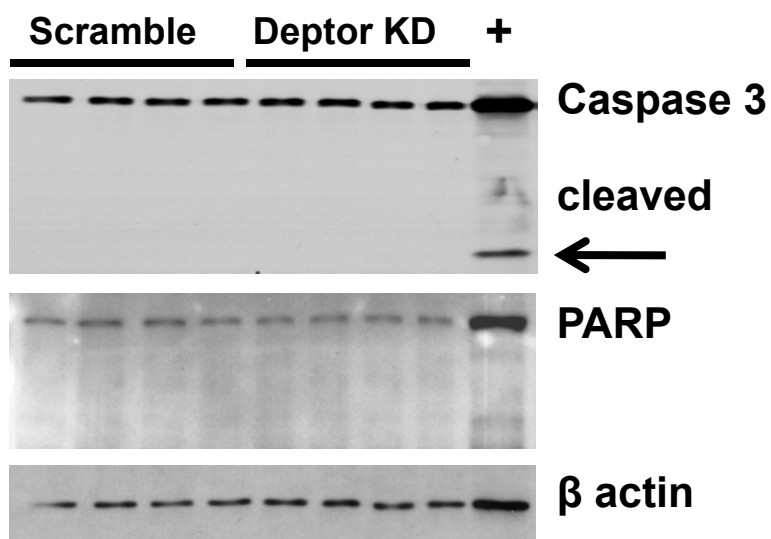

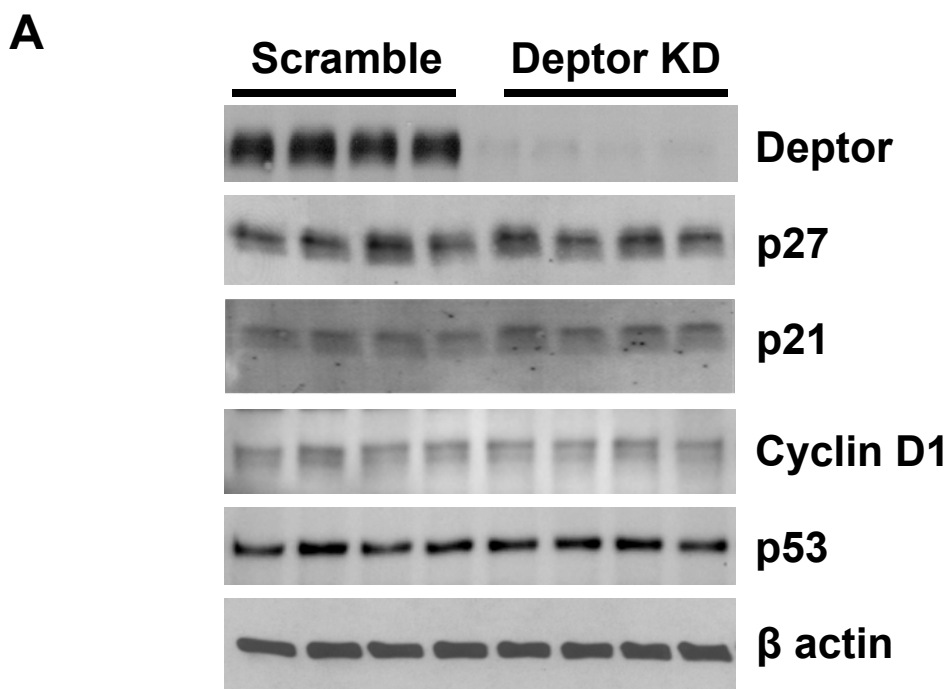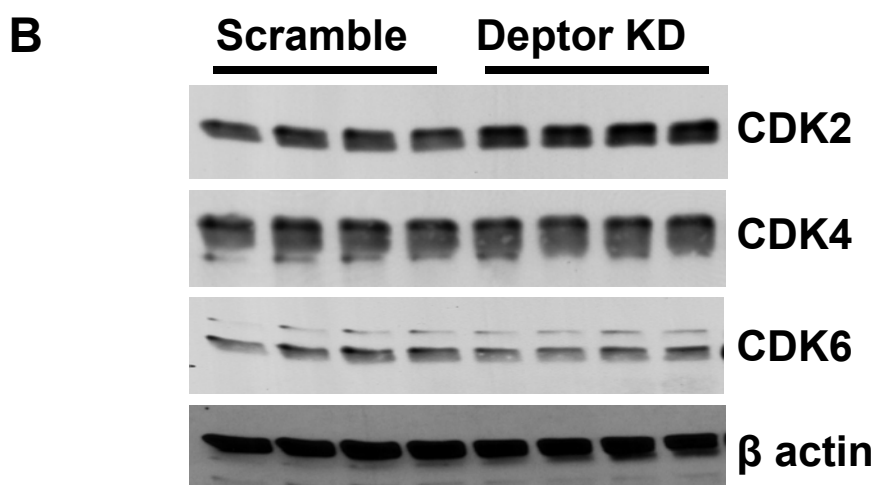

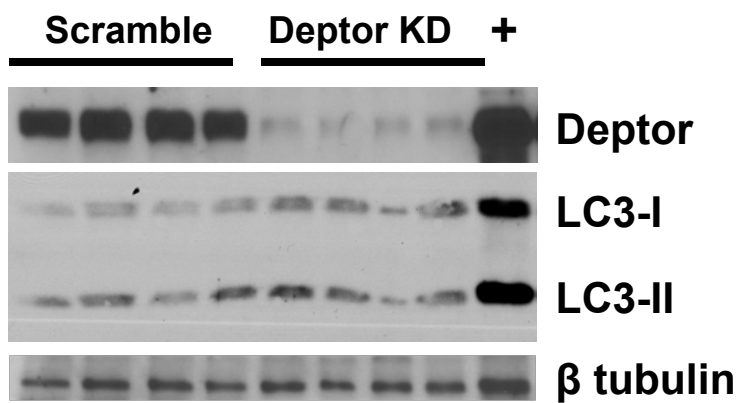

Supplement: 11_70_Kazi_Suppl.pdf [file 11_70_Kazi_Suppl.pdf]
